# Supplementary material
Source: PubMed Central journal article supplement (PMC2528956)
Supplement: NIHMS60473-supplement-2.pdf [file NIHMS60473-supplement-2.pdf]

```
/*Tricks to get proc mixed to work on a full scale model*/  
/*
```

Assign unique integer value to each protein and for each peptide within a protein

```
protein Peptide  
  1      1  
  1      2  
  1      2  
  2      1  
  2      2  
  2      3  
  3      1  
  3      1  
  3      1  
  3      2  
  .....  
.....
```

When starting SAS make sure you have enough temp work space (~2GB) as well as memory (~2GB) by using

```
sas -work /workdirectroy -memsize 2000m
```

where workdirectory is a pointer to a directroy with 2GB of space for reading and writing datasets

Proc Mixed spends a lot of time and effort estimating the correct degrees of freedom for testing. This has NO effect on parameter estimates and since there is really no interest in testing at this point use the ddfm=bw (between-within) option since it uses the least amount of effort.

lognote is a nice option since it sends notes to the log regarding where proc mixed is at in the fitting process. Its better than looking at a blank screen for 12 hours.

outp creates the output dataset of the orginal data along with the residual or normalized abundance values

Author:  
Douglas W. Mahoney  
mahoney@mayo.edu

```
*/
```

```
proc mixed data=four  noclprint lognote;  
  class ms0343_run channel protein peptide;  
  model abundance=ms0343_run|channel/ddfm=bw outp=normalized;  
  random int peptide/subject=protein;  
run;
```
